# Supplementary material for: Heterologous expression of a lycophyte protein enhances angiosperm seedling vigor
Source: Oxford University Press journal article supplement (doi:10.1242/dev.200917), 2022-10-05
Supplement: dev200917supp.pdf [file dev200917supp.pdf]

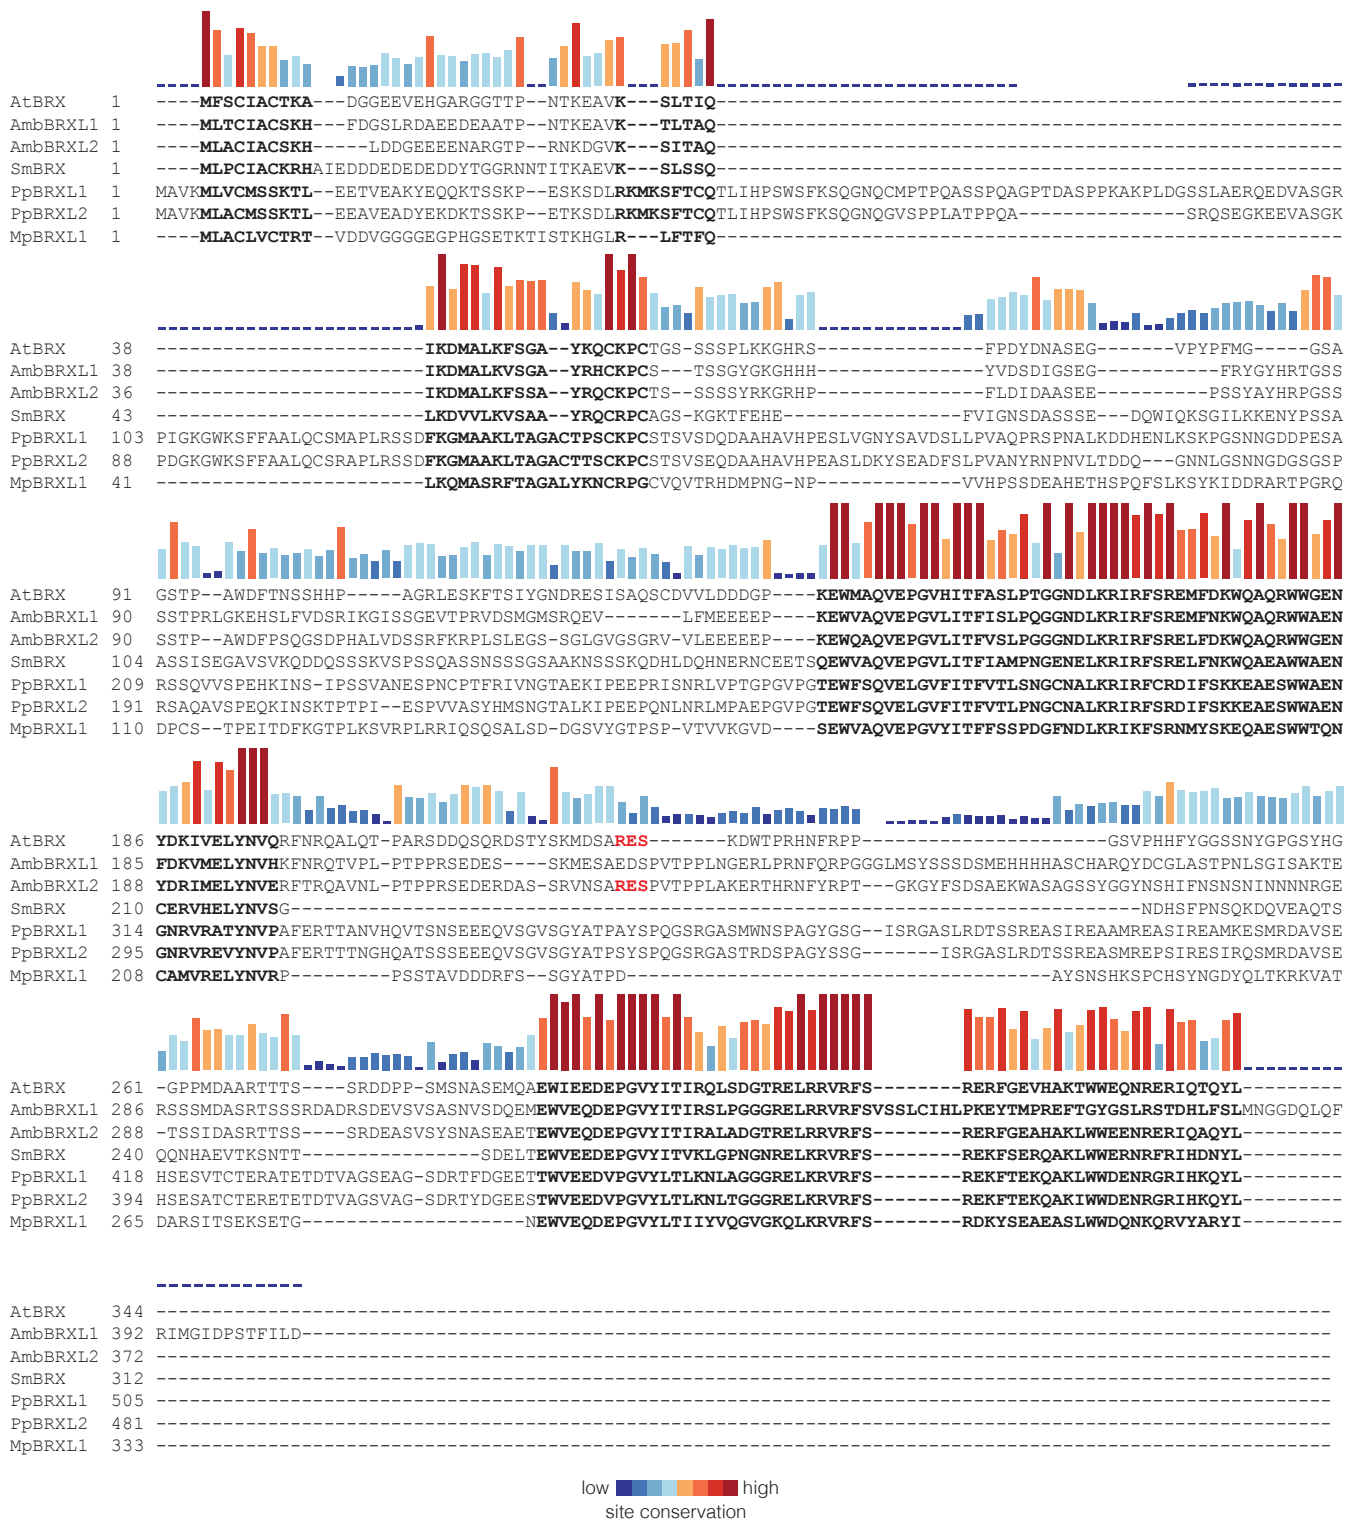

**Fig. S1. Sequence alignment.** Alignment of BRX family proteins from *Arabidopsis thaliana* (AtBRX), *Amborella trichopoda* (AmbBRXL1 and AmbBRXL2), *Selaginella moellendorffii* (SmBRX), *Physcomitrium patens* (PpBRXL1 and PpBRXL2), and *Marchantia polymorpha* (MpBRXL1). The AGC kinase target phosphosite of AtBRX and AmbBRXL2 in the linker between the BRX-domains is highlighted in red.

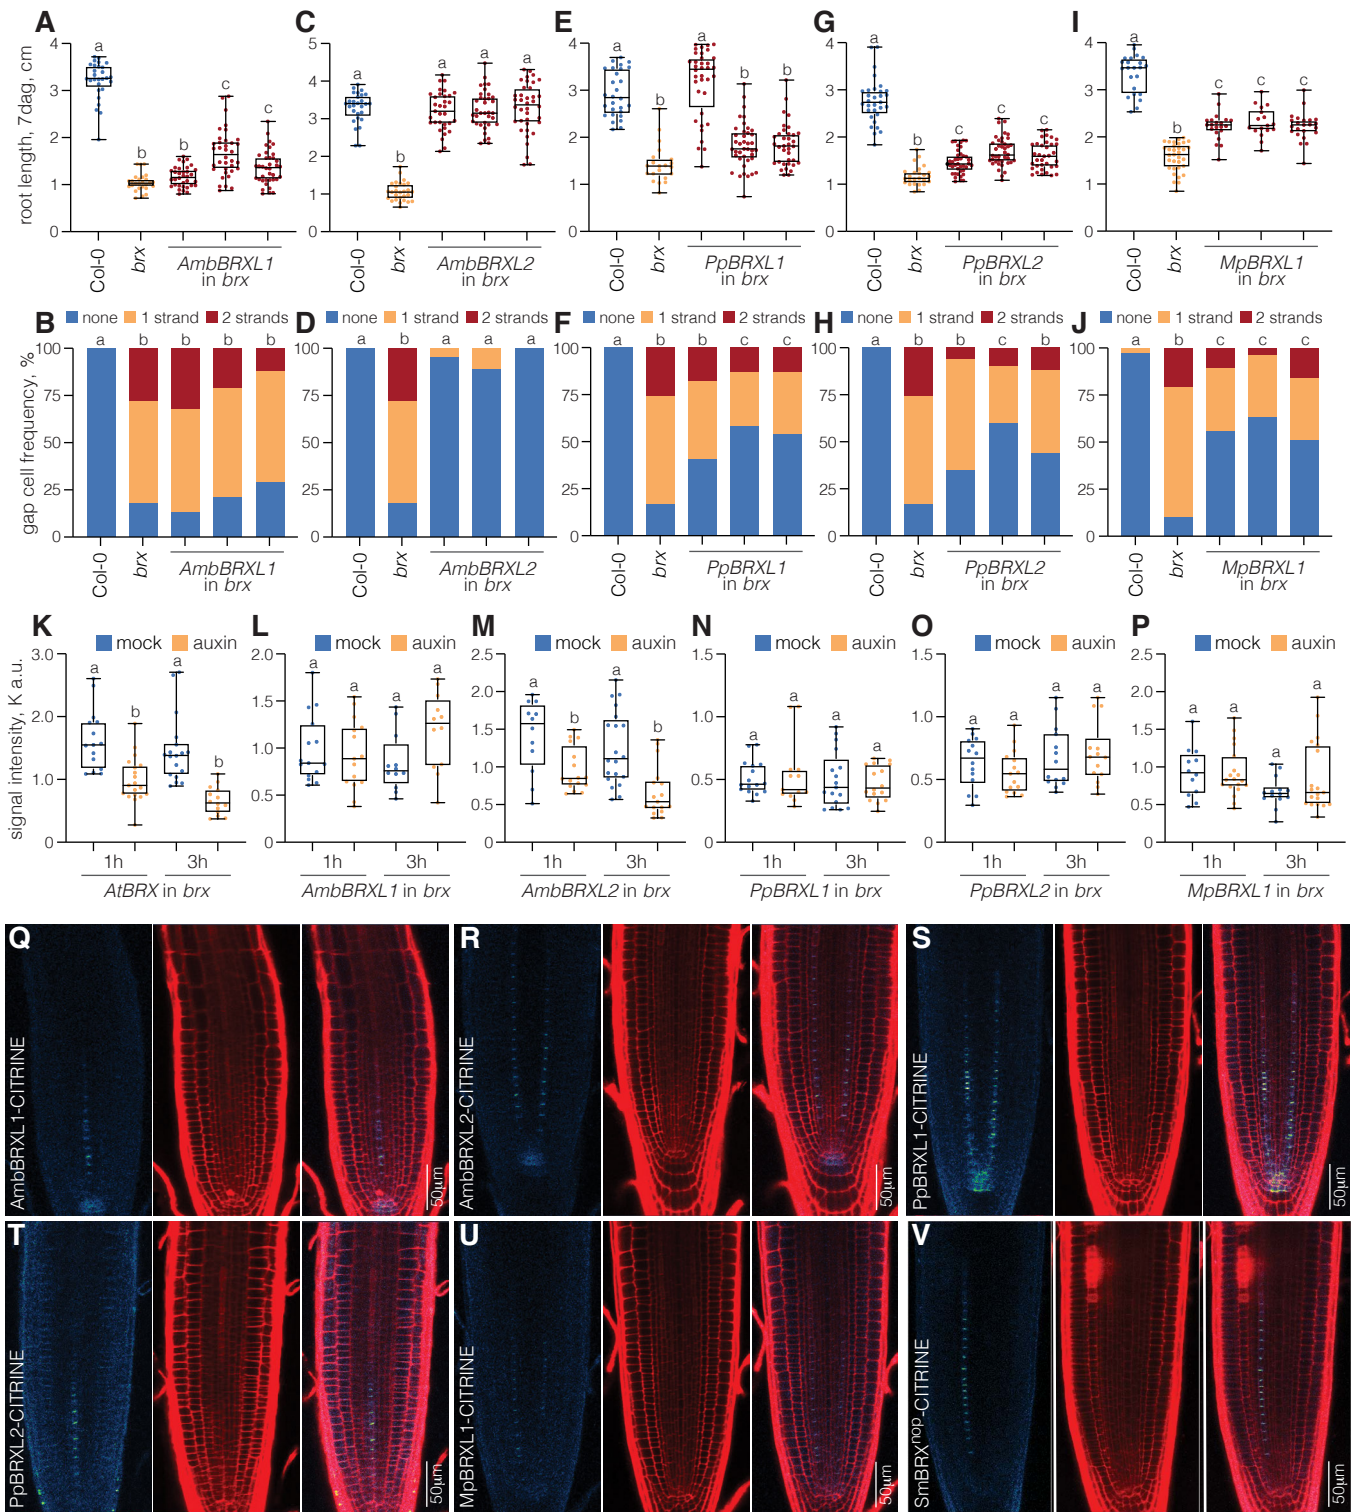

**Fig. S2. Functional assays of BRX family proteins across the green lineage.** (A-J) Root length of 7-day-old seedlings and corresponding quantification of protophloem sieve element differentiation defects (“gap cells”) in 7-day-old roots from Col-0 wildtype, *brx* mutant, and three representative independent transgenic lines each expressing the indicated BRX family proteins under control of the *A. thaliana* *BRX* promoter in *brx* background. (A) n=26-38 roots; (B) n=17-31 roots; (C) n=28-38 roots; (D) n=26-41 roots; (E) n=21-40 roots; (F) n=22-31 roots; (G) n=25-40 roots; (H) n=17-25 roots; (I) n=17-33 roots; (J) n=29-45 roots. (K-P) Signal intensity quantification of indicated CITRINE fusion proteins (expressed under control of the *A. thaliana* *BRX* promoter) at the rootward plasma membrane of developing protophloem sieve elements, 1h or 3h after mock (DMSO) or auxin (10 $\mu$ M 1-naphthalene-acetic acid) treatment. (Q-V) Confocal microscopy images of indicated CITRINE fusion proteins (expressed under control of the *A. thaliana* *BRX* promoter), showing their protophloem-specific expression and polar localization (green fluorescence, left panels). Central panels show propidium iodide-stained cell wall outline (red fluorescence), right panels show the overlay. Box plots display 2nd and 3rd quartiles and the median, bars indicate maximum and minimum. Statistically significant different samples (lower case letters) were determined by Fisher’s exact test (B, D, F, H, J) or ordinary one-way ANOVA (A, C, E, G, I, K-P).

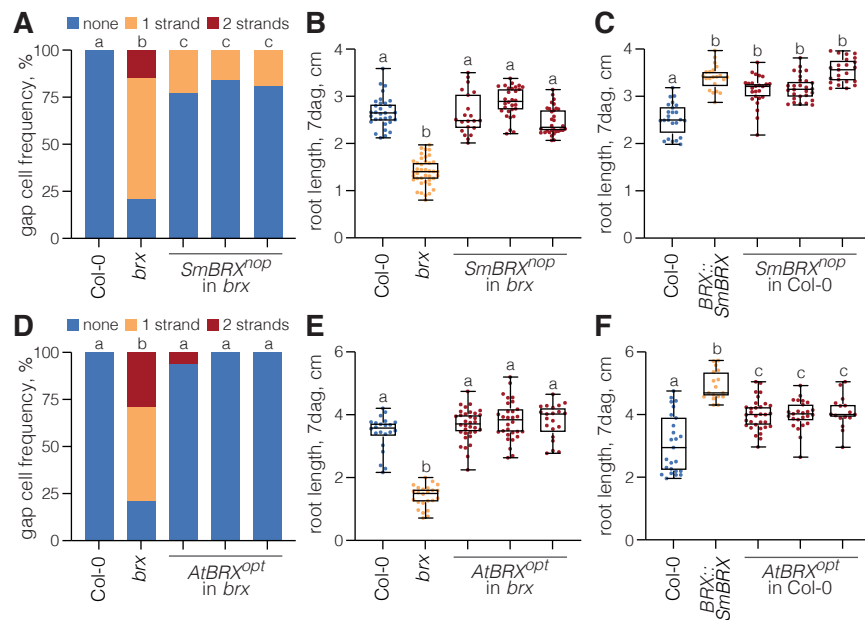

**Fig. S3. Functional assays of codon-(non)-optimized SmBRX and AtBRX variants.** (A) Quantification of protoxylem sieve element differentiation defects (“gap cells”) in 5-day-old roots from Col-0 wildtype, *brx* mutant, and three independent transgenic lines expressing a non-codon-optimized SmBRX variant (SmBRX<sup>nop</sup>) under control of the *A. thaliana* BRX promoter in the *brx* background. n=27-48 roots. (B) Root length of 7-day-old seedlings corresponding to the genotypes assayed in (A). n=21-40 roots. (C) Root length of 7-day-old seedlings from Col-0, *brx*, and three independent transgenic lines expressing SmBRX<sup>nop</sup> under control of the *A. thaliana* BRX<sup>opt</sup> promoter in Col-0 background. n=21-28 roots. (D-F) Similar to (A-C), for an *A. thaliana* codon-optimized AtBRX variant (AtBRX<sup>opt</sup>). (D) n=14-27 roots; (E) n=21-34 roots; (F) n=16-32 roots. Box plots display 2nd and 3rd quartiles and the median, bars indicate maximum and minimum. Statistically significant different samples (lower case letters) were determined by Fisher’s exact test (A, D) or ordinary one-way ANOVA (B, C, E, F).

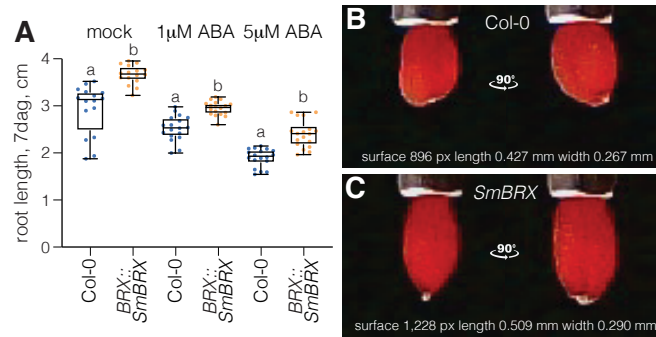

**Fig. S4. Illustration of increased seed and embryo size upon heterologous SmBRX expression.**

(A) Root length of 7-day-old seedlings from Col-0 and *BRX::SmBRX* plants, grown on media supplemented with increasing amounts of abscisic acid. n=16-18 roots; (B-C) Illustration of high resolution seed imaging with the *Boxeed* platform, for a Col-0 wildtype (B) and an *SmBRX* transgenic seed (C). Measured parameter values for the seeds shown are indicated.

**Dataset 1.** Protein sequence alignment of 302 BRX family proteins retrieved from a cross the green lineage with scaffold IDs (One Thousand Plant Transcriptomes, 2019) and species names, html file.

[Click here to download Dataset 1](#)

## Dataset 2. Open reading frame coding sequences of BRX family genes and variants used for the creation of transgenes, pdf file.

### *AtBRX<sup>opt</sup>* – *Arabidopsis thaliana* BRX, codon-optimized for *A. thaliana*

ATGTTTCAGCTGTATCGCTTGCACCAAGGCTGATGGTGGTGAAGAGGTTGAACATGGTGTCTAGAGGTGGAACCTACCCCGAACACAAAAGAGGCTGTTAAGTCCTT  
CACCATTCCAGATCAAGGACATGGCCCTTAAGTTTCAGCGGAGCTTACAAGCAGTGAAGCCTTGTACCGGGTCTCTTCTCACCTCTCAAGAAGGGACACCGTAG  
CTTCCCTGATTACGACAATGCTTCTGAGGGTGTGCCGATCTCTTTTATGGGAGGATCTGCTGGATCTACCCCTGCTTGGGATTTACCAACTCTTCTCATCATCTG  
CTGGCAGGCTCGAGTCTAAGTTCACTTCTATCTACGGGAACGACCGTGAGAGCATCTCTGCTCAGTCTTGTGATGTGGTGTCTGATGACGACGGACCGAAAGAAT  
GGATGGCTCAAGTTGAACCTGGTGTGCATATTACCTTCGCTTCTCCCTACCGGTGGAAACGATCTCAAGAGGATCAGATTACGCCGTGAGATGTTGACAAGT  
GGCAAGCTCAAGATGGTGGGGAGAGAAGTACGACAAGATCGTCGAGCTTTACAACGTGAGAGGTTCAACAGACAGGCTCTCAAACTCTGCTAGGTCTGAT  
GATCAGTCTCAGAGGGACAGCCTACAGCAAGATGGATTCTGCTGTGAGTCTAAGGATTGGACCCCTAGACACAACCTCAGGCTCCAGGATCTGTGCCTCAT  
CATTTCTACGGCGGCTCATCTAATTACGGACCGGATCTTATCATGTGGACCTCAATGGATGCTGTCTAGAAGTACCCCTCTTAGGGATGACCCCTCCGCTCAT  
GTCTAACGCTTCTGAGATGCAAGCTGAGTGGATCGAAGAGGATGAGCCTGGTGTGTACATCAGATCAGGCAGCTTTCTGATGGAACAGAGAGCTTCGTCGAG  
TCAGGTTCTCAAGAGAGGTTTCGGAGAAGTTCACGCTAAGACTTGGTGGGAGCAGAACAGAGAGAGAATCCAGACTCAGTACCTC

### *SmBRX<sup>nop</sup>* – *Selaginella moellendorffii* BRX, non-optimized original sequence

ATGCTGCCCTGTATTGCTTGAACGCGCATGCGATTGAGGACGATGACGAAAGCAGAGGACGAGGACGATTACACTGGAGGCCAAACACAATTACAAGG  
CCGAGGTCAAGTCTTGTCTTACAGCTCAAAGACGTGGTTTTGAAGGTCTCGGCCGCTTACAGGCAATGCAGGCCATGCGCTGGATCAAAGGGGAAAATTTCC  
AGCAGCAATTCGATGTTGAAACTCGGATGCTTCGTCGTCGAGGATCAGTGGATCCAAAAGTCTGGGATTCTCAAGAAGGAGAATTATCCAGCAGTGTGCG  
AGCTCCATCTCTGAGGGCGCAGTCTCGGTGAAACAGGACGATCAATCCAGTAGTAAAGTTTCCAGGATGATCAAGCGAGTAGCAACAGCAGCAGTGGATCCGC  
GGCGAAGAATCTTCTTCAAACAAGATCATCTTGACCAACATAACGAGAGGAAGTGGCAGGAGACGACGCCAGGAATGGGTGGCACAAGTGCAGCTGGCGTTC  
TTATACTTTCATAGCAATGCCAACGAGAGAAGCAGTCAAGAGAATTCGATTCAGTCTGCGAGCTTTTAAACAAATGGCAAGTGAAGCATGGTGGCCGAGA  
ACTGTGAGAGGCTTCAACGCGCAGCAAGACGCTCTGGAAACGATCACTCGTTTTCCAAACAGCCAGAAAGATCAAGTGGAAAGCACAACTCGCAGCAAAAATCAG  
CGGAAGTGAATAAACAACACTACGAGTACGAACTGACCAATGGTGTGAAAGACGAGCCCGGGTTTATCACTGTGAAGCTCGGCCAAAATGGCAAC  
CGAGAATAAAGCGTGAAGATTCAGTTCGCGAGAAGTTTACGAGAGGCAAGCAAAGCTATGGTGGGAGAGGAATCGCTTGAATACACGACAATTATTTG

### *AtBRX<sup>sm1</sup>* – “*S. moellendorffii*-like” *A. thaliana* BRX, in frame deletion of amino acids 219-266

ATGTTTTCTGCATAGCTTGTACCAAGCAGACGGAGGTGAAGAAGTGAACATGGAGCGGTGGAGGCACCCTCCCAATACTAAAGAAGCCGTCAAAGCCT  
AACCATTAGATTAAGATATGGCTTTGAAATTTCTGGTGTCTATAAACAATGCAAGCCATGCACTGGTCTCTAGTAGTCCCTGAAGAAAGGACATAGATCAT  
TTCCGGATTATGACAATGCCTCTGAAGGTGTCCATACCCTTTCATGGTGGAAAGTGTGTTCAACTCTGCTGGGACTTCACAACTCCTCTCATCATCCAGCT  
GGACGGTTAGAAATCAAGTTCACTTCAATATATGAAATGATCGAGAATCTATCTCTGCACAGTCTTGTGATGTTGACTGGATGATGATGGACAAAAGAGTGG  
ATGGCTCAAGTAGAACCTGGTGTTCATATCACATTTGCTTCTTCCCCTGGAGGAAATGATCTCAAACGGATCCGTTTCAGCCGAGAGATGTTTGATAAGTGGC  
AAGCTCAACGGTGGTGGGGTGAAGACTATGACAAGATCGTTGAGCTTACAATGTACAGAGATTAACCGCAAGCTCTCAAACCGCTGCAAGATCCGACGATC  
AGTCAAGAGAGGATCAACGCGCAGCAAGAACCCACAACCTTCCAGAGATGATCCACCTTCCATGAGCAATGCTAGTGAATGCAAGTGAAGTGAAGAGC  
GACGAGCTGGTGTACATTACCATCAGACAATTATCAGATGGGACTAGAGAGCTACGTGAGTCAAGTTCAGCCGGGAACGGTTTGGGGAAGTGCATGCAAA  
GACATGGTGGGAGCAGAACAGAGAGAGAATAACAACAGTACCTC

### *AmbBRXL1* – *Amborella trichopoda* BRXL1, codon-optimized for *A. thaliana*

ATGCTCACCTGTATCGCTTGTCTAAGCACTTCGATGGATCTCTCAGGGATGCTGAAGAAGATGAGGCTGTACCCCTAACACCAAGAGGCTGTTAAGACTCTCA  
CCGCTCAGATCAAGGATATGGCTCTCAAAGTGTCTGGTGTCTACAGGCATTGCAAGCCTTGTCTACCTCTTCTGGATACGGAAGGGACACCACCTATGTGG  
ATTCTGATATCGGATCTGAGGGATCAGGTACGGATACCACAGAACCGGATCTTCTACCTTCTACCCTAGGCTCGGAAAAGAGCACTCACTCTTCTGTTGATTCTAG  
GATCAAGGGAATCTCTTCTGGTGTAGGTGACCCCTAGAGTGGATTCTATGGGAATGTCTAGGCAAGAGGTTCTTCTCATGGAAGAGAGGAACTAAAGAGTGGG  
TTGCACAGGTTGAGCCTGGTGTCTTATTACCTTCTCACTTCCACAGGGTGAACAGATCTCAAGAGGATCAGGTTCTCTAGGGAATGTTCAACAAGTGGCA  
GGCTCAGAGATGGTGGGCTGAGAATTCGATAAGGTGATGGAATCTACAACGTGCACAAGTTCAACAGGCAGACTGTGCCTTCCAAACCCCTCTAGATCTGA  
GGATGAGTCACTAAGATGGAATCTGCTGAGGATCTCCTGTGACCCCTCACTAATGGTGTGAGAGACTCCCTAGAAAATCCAGAGGCCTGGTGTGGACTTAT  
GTCTTACTCTTCTGATTCAATGGAACATCACCACCAGCTTCATGCCAGCTAGACAATACGATTGCGGACTCGCTTCTACTCTAACCTCTCTGGAATCTCTGC  
TAAGACCGAGAGGTCTAGTTCTATGGATGCTTCTAGGACCTTCTATCTAGGGATGCAAGATAGGTTCTGATGAGGTGTCAGTGTCTGCTTCAACGTGAGTATCA  
AGAGATGGAATGGGTTGAGCAGGATGAACCTGGTGTGATATTAATCAATCAGATCTCTCCAGGTGGTGGAAAGGAACTCAGAAGAGTTAGGTTCTCTGTTTCTC  
TCTCTGATCCACCTCCAAAAGAGTACACCATGCTAGGGAATTCACCGGATACGCTTCTCAGGCTACCGATCATCTTCTCACTCATGAACGGTGGTGTATC  
AGCTCAGTTCAAGATCATGGTATCGATCTTCAACCTTCACTCCTGAT

### *AmbBRXL2* – *Amborella trichopoda* BRXL2, codon-optimized for *A. thaliana*

ATGCTCGCTGTATCGCTTGTCTAAGCACCTCGATGATGGTGAAGAGGAAGAGAAGCCTAGAGGAACCCCTAGGAACAAGGATGGTGTGAAGTCTATCACCGC  
TCAGATCAAGGATATGGCTCTCAAGTCTTTCAGCTTACAGGCAGTGAAGCCTTGTACCTTCTTAGTCTTCTTACAGAAAAGGGAAGGACCCCTTCTTCTGATA  
TCGATGCTGCTTCTGAGGAACCATCTTACGCTTACCACAGCCTGGATCTTCTACTCCAGCTTGGGATTTCCATCTCAGGAAATGATCTCATCTGCTC  
TCGTGGATCTCTAGGTTCAAGAGGCCTTGTCTCTGAGGGATCTTCTGACTTGGAGTGGGATCTGGAAGAGTGTGTTCTCAGGAAAGAAAGGAACTAAAG  
AGTGGCAAGCTCAGGTTGAGCCTGGTGTGCTTATTACCTTCTGCTTCTTCTGGTGGTGAACAGATCTCAAGAGGATCAGGTTCTCTAGGGAATCTTCTGATAA  
GTGGCAGGCTCAAAGATGGTGGGGAGAGAAGTACGATAGGATCATGGAATCTACAACGTGGAAGGTTCCACAGGCAGGCTGTTAACCTTCTACTCTCTA  
GATCTGAGGATGAGAGGGATGCTTCTCAAGGGTGAACCTGCTAGGGAATCTCTGTTACTCTCCACTCGCTAAAGAGAGGACCCACAGAACTTCTACAGGC  
CTACTGGAAGGGATACTTCTGATTCTGCTGAGAAGTGGGCTTCTGCTGGATCATCTTACGGTGGATACAACCTCTCACATCTTCAACTTAACCTAATTAAC  
AACAACTAAGGGGAGAGACTTCTCAATCGATGCTTCTAGGACCACTAGTTCTAGGGATGAGGCTTCTGTGCTTACTTAACGCTTCAAGAGGCTGAGACTG  
AGTGGGTTGAACAAGATGAACCTGGTGTGTACATCACTATCAGGGCTCTGCTGATGGAACAGAGAGCTTAGAAGGGTTAGGTTCTCAAGAGAGAGGTTCCGA  
GAGGCTCATGTAAGCTTGGTGGGAGGAAAACAGAGAGAGAATCCAGGCTCAGTACCTC

**S<sub>m</sub>BRX** – *S. moellendorffii* BRX, codon-optimized for *A. thaliana*

ATGCTCCCTTGATCGCTTGCAAGAGACACGCTATCGAGGATGATGATGAGGACGAGGACGAAGATGATTACACCGGTGGACGTAACAACACCATCACTAAGGC  
TGAGGTGAAGTCCCTCTCAAGCCAGCTCAAGGATGTTGTGCTCAAGGTGTCAGCTGCTTACAGACAGTGTAGACCTTGCCTGGATCTAAGGGAAAGACTTTCGA  
GCACGAGTTCGTGATCGGAAACAGCGACGCTTCTTCTATCTGAGGATCAGTGGATCCAGAAGTCCGGGATCCTCAAGAAAGAGAAGTACCTAGCTCCGCCGCTC  
TTCTATTTCTGAAGGTGCTGTTTCTGTGAAGCAGGACGACCAGTCCAGCTCTAAGGTTAGCCCTTCTAGCCAGGCTCCAGCAATTTCTTCTGTTCTGCTGCCA  
AGAACAGCTCCTTAAGCAGGATCATCTCGACCAGCACAACGAGAGAAACTGCGAAGAGACTTCTCAAGAGTGGGTTGCACAAGTTGAGCCTGGTGTGCTC  
ACCTTCATTGCTATGCCTAACGGGGAGAACGAGCTGAAGAGAATCAGGTTCTCTCGTGAAGTGTTCACAAGTGGCAAGCTGAAGCTTGGTGGGCTGAAAACG  
TGAGAGAGTGCACGAGCTGTACAACGTGAGCGGAAACGATCACAGCTTCCGAACTCTCAGAAGGATCAAGTTGAGGCTCAGACCAGCAACAGAACCATGCTG  
AGGTTACCAAGAGCAACACCACCTCTGATGAGCTTACTGAGTGGTTCGAAGAGGATGAACCTGGGGTTTACATCACTGTGAAGCTCGGACCTAACGGGAACAGA  
GAGCTTAAGAGGGTCAGATTGACCGGTGAGAAGTCTCTGAGAGACAGGCTAAGCTTGGTGGGAGAGAAACCGTTTCAGGATCCACGATAACTACCTC

**P<sub>p</sub>BRXL1** – *Physcomitrium patens* BRXL1

ATGGCTGTCAAATGTTGGTTGCATGAGTTCGAAGACTCTGGAAGAGACCGTTGAAGCCAAATATGAGCAACAGAAGACGTCGTGCAAAACCGGAGTCCAAATC  
AGACTTGCAGAAAATGAAGTCGTTCACTTGCCAGACCTGATTCATCCGCTTGGTCTTTAAAGCCAAGGAAACCAATGCATGCCTACACCGCAAGCAAGTTCA  
CCCCAAGCAGGTCCAAGTATGCAAGTCCGCCCAAAGCTAAGCCACTTGATGGAAGTCTTTGGCTGAGAGACAGGAAGATGTCGCGTCCGGGAGACCTATTGG  
AAAAGGCTGAAAAAGTTTTTTCGACGCTACAATGCTCAATGGCACCATTACGATCTCTGATTTTAAAGGAAATGGCGGCTAAGTTGACAGCAGGAGCTTGTAC  
ACCATCATGCAAGCCTTGTTCAACTTCTGTTTCTGATCAAGACGCTGCGCATGCTGCCACCCAGAGTCTTGGTGGGAAATTATAGTGTGTCGATTCTTGTCTAC  
CAGTGGCTCAACCTCGAAGTCTAATGCGTTGAAAGATGACCATGAAAACCTCAAGAGTAAACCCGGAAGTAAATGAGAGATGATCCAGAGTCCGCGCGGTCA  
TCTCAAGTGGTCTCCCGGAACACAAAATCAATAGCATCCCTCCAGCGTAGCAAATGAAAGCCGAACTGTCCAACATTCCGTATTGTGAATGGTACTGCTGAGA  
AGATTCTGAGGAGCCTCGAATTTGCAATCGTCTAGTTCGACGGGGCCGGGTTCCTGGCACAAGAATGTTTTTCAACAAGTGAAGCTTGGAGTATTCATTACATT  
CGTGACTCTGTCCAACGGTTGCAACGCACTGAAACGAATTCGATTTTGTGAGATATTTTTAGTAAAGAAAGAGCTGAATCGTGGTGGGCGGAGAATGGAATCG  
TGTCCGCGCAACCTACAACGTGCTTTCGAAAGAACGACAGCAAATGTTCAAGTCACTTCAAATTCAGAAGAAGAGCAGGTATCAGGGGTTTCAGGGTA  
TGCAACCCGGGCTATAGTCCACAGGGGTCACGGGGAGCTTCAATGTGGAATTTCCGGCTGGCTATGTTTCTGGGATATCCCGTGGAGCATCTTTGAGGGACA  
CATCAAGCAGGGAAGCCTCAATCAGGGAGGCTGCAATGAGGGAAGCCTCGATTGAGAAGCAATGAAAGAGTCTATGAGGGATGCGGTTAGCGAGCACTCTGA  
ATCTGTAACCTGACCGAAAGAGCAACCGAAACAGACACCGTTGCTGGGAGTGAGGCAGGCACTGACAGAATTTCCAGCGGAGAAGAACTACTTGGGTTGAAG  
AAGACGTTCTGTTGATATTTAATTAAGAAATTTGGCCGGCGTGGGAGAGAGTTGAAGCGTGTGAGGTTGAGCCGTGAAAAATTTACAGAGAAGCAAGCA  
AAACTCTGGTGGGATGAGAACCGGGGGAGAATTCATAAACAATATCTA

**P<sub>p</sub>BRXL2** – *Physcomitrium patens* BRXL2

ATGGCCGTCAAATGCTGGCTTGCATGAGTTCGAAAACCTTGAAGAGGCGCTCGAAGCCGACTATGAGAAGGACAAGACATCGTCCAAGCCGGAGACCAAATC  
TGACTTGCAGAAAATGAAGTCAATTTACTTGTGAGACCTGATCCATCCGCTTGGTCTTTAAAGCCAAGGAAATCAAGGTGTGTCACCACTCTAGCACTCCAC  
CTCAAGCAAGTCTGTCAGTCAAGGGAAGGAGGAGGTCGCGTCCGGGAAACCTGATGGAAGGTTGGAAGGTTTCTTTCGACGCTGCAATGCTCGAGGGC  
ACCGCTGCGATCTTCAAGTCAAGGGAATGGCGGCTAAGTTGACAGCAGGAGCTGTACAACCTTTCGAAAGCTTTCGAAAGCTTCAACTTCTGTTTCAGAGCAAGACGCT  
GCGCATGCTGTCATCCAGAGGCTTCAATGGACAAATACAGTGAGGCTGATTTTTCCAGTGGCCAAATTCGAAATCCTAATGTGTTGACAGATGATCAAG  
GAAATAACCTCGGAAGTAAATGAGAGCGGCTCAGGTTCTCCGCTTCTGCTCAAGCGGCTCCTCCCGGAGCAGAAAATCAATAGTAAAACCTCTACCCCAATTG  
AAAGCCAGTTGTTGCGAGCTATCATAGCAATGGAACGCTTTGAAAGATTCTGGAAGAACCTCAAATTTGAATCGTCTATGCCGGCTGAACAGGAGTGTCC  
TGGCACTGAATGGTTTTCAAGTGAAGCTTGGAGTATTCATAACGTTTGTGACTCTACCTAACGGTTCGAATGCTCTAAAACGAATTAGATTAGCCGAGACATT  
TTCAGCAAAAAGAAAGCTGAATCGTGGTGGGCGGAGAATGGAATCGTTCCTGAAAGTCTATAACGTACCAGCTTTCGAAAGGACAACGCAAAATGGTACCA  
GGCTACTTCAAGTTGAGAAGAAGAGCAGGTTTCAGGGGATCAGGGTATGCTACCCCTCTATAGTCCGCAAGGGTCAAGAGGAGCTTCAACAAGGGATTAC  
CGGCTGGCTACAGTTCTGGGATATCGCGTGGAGCATCTTTGAGGGATACATCGAGCAGAGAGGCTCAATGAGAGAACCCTGATCAGAGAATCCATCAGACAG  
TCGATGAGGGATGCGGTCAGCGAATCCGAATCCGCAACGTGTACTGAGAGAGAGACTGAAACAGATACAGTTGCTGGAAGCGTGGCAGGTAGCGACAGAA  
CTTATGACGGCGAAGAATCCACTTGGGTTGAGGAAGACGTTCTGGTGTATTTAATTAAGAAATTTGACTGGAGGTGGTAGAGAGTTGAAGCGTGTGAGG  
TTCAGTCTGAAAAGTTCCCGGAGAACAGGCCAAAATATGGTGGGACGAGAACCAGCGGGGCAATTCACAACAGTATCTA

**M<sub>p</sub>BRXL1** – *Marchantia polymorpha* BRXL1, codon-optimized for *A. thaliana*

ATGCTTGTGCTCGCTCGTGTGCACTAGAACCCTGGATGATGTTGGAGGTGGTGGTGAAGGACCTCATGGATCTGAGACTAAGACCATCTCTACCAAGCAGGGGCTC  
AGACTTTCACITTCAGCTTAAAGCAGATGGCCTTAGGTTTACTGCTGGGGCTTTTACAAGAAGTGCAGACCTGGATGCGTTCAGGTGACCAGACATGATATGC  
CTAACGGAAACCTGTGGTGCACCTTCTATCTGATGAGGCTCATGAGACACACAGCCCTCAGTTTCTCACTCAAGAGCTACAAGATCGATGACAGGGCTAGAAGT  
CTGGAAGGCAGGATCCTTGTCTACTCTGAGATCACCAGCTTCAAGGGAACCCCTCTCAAGTCTGTTAGACCTCTCAGAAGGATCCAGAGCCAGTCTGCTCTTTC  
TGATGACGGATCTGTGACGGAACCTTCTCTCTGTTACCCTGTTGAAGGGTGTGACTCTGAGTGGGTTGCACAAGTTGAGCCTGGTGTGATATTACTTCTC  
AGCAGCCCGGACGGATTCAACGATCTCAAGAGGATCAAGTTGAGCCGTAACATGTACAGCAAAGAGCAGGCTGAGTCTTGGTGGACTCAGAAGTGTGCTATGGT  
GCGTGAGCTTTACAACGTGAGGCTCCTTCTTCTACCCTGTGGATGACGATAGGTTGAGCTCTGGATACGCTACCCCTGACGCTTACTCTAACTCTACAAGTCTC  
CGTGCCACTTTACAACGTTGATTACCAGCTCACAAGCGTAAGGTGGCAACCGATGCTAGATCTATCACCAGCGAGAAGTCTGAGACTGGAATGAGTGGGTC  
GAGCAGGATGAACCTGGTGTACCTACCATCATCTACGTGCAAGGTGTGGGAAAGCAGCTCAAGAGAGTGAAGTCTCTAGGGACAAGTACTCTGAGGCTGA  
GGCTTCTTGTGGTGGGATCAGAACAAGCAGAGGGTGTACGCTCGTTACATC
